1 **Binocular visual experience and sleep promote visual cortex plasticity and**  
2 **restore binocular vision in a mouse model of amblyopia**

3

4 Jessy D. Martinez<sup>1</sup>, Marcus J. Donnelly<sup>2</sup>, Donald S. Popke<sup>2</sup>, Daniel Torres<sup>1</sup>, Lydia G. Wilson<sup>1</sup>,  
5 William P. Brancaleone<sup>2</sup>, Brittany C. Clawson<sup>1</sup>, Sha Jiang<sup>1</sup>, Sara J. Aton<sup>1#</sup>

6

7 <sup>1</sup> Department of Molecular, Cellular, and Developmental Biology, University of Michigan, Ann  
8 Arbor, MI 48109.

9 <sup>2</sup> Undergraduate Program in Neuroscience, University of Michigan, Ann Arbor, MI 48109.

10

11 # Corresponding Author:

12 Dr. Sara J. Aton

13 University of Michigan

14 Department of Molecular, Cellular, and Developmental Biology

15 4268 Biological Sciences Building

16 1105 N. University Ave

17 Ann Arbor, MI 48109

18 phone: (734) 615-1576

19 email: [saton@umich.edu](mailto:saton@umich.edu)

## 20 **Abstract**

21 Amblyopia arises from an altered balance of input from the two eyes to the binocular zone of  
22 primary visual cortex (bV1) during childhood, causing long-lasting visual impairment. Amblyopia  
23 is commonly treated by patching the dominant eye, however, the relative impacts of monocular  
24 vs. binocular visual experiences on restoration of bV1 function remains unclear. Moreover, while  
25 sleep has been implicated in V1 plasticity in response to vision loss, its role in recovery from  
26 amblyopia is unknown. We used monocular deprivation (MD) in juvenile mice to model  
27 amblyopia in bV1. We compared recovery of visual responses for the two eyes among bV1  
28 regular spiking (RS, putative principal) neurons and fast-spiking (FS, putative parvalbumin-  
29 expressing [PV+]) interneurons after identical-duration, identical-quality binocular recovery (BR)  
30 or monocular, reverse occlusion (RO) experiences. We find that BR is quantitatively superior to  
31 RO with respect to renormalizing both bV1 populations' visual responses. However, this  
32 recovery was seen only in freely-sleeping mice; post-BR sleep deprivation prevented functional  
33 recovery. Thus, both binocular visual experience and subsequent sleep are required to optimally  
34 renormalize bV1 responses in a mouse model of amblyopia.

## 35 Introduction

36 Experience-driven synaptic plasticity during critical developmental periods affects  
37 lifelong sensory and behavioral functions (1, 2). Brief monocular deprivation (MD; occlusion of  
38 one of the two eyes) during early postnatal development shifts responsiveness of primary visual  
39 cortex (V1) neurons to lose binocular responsiveness (3, 4). This phenomenon, known as ocular  
40 dominance plasticity (ODP), results from depression of deprived eye (DE) responses, followed  
41 by potentiation of spared eye (SE) responses, among V1 neurons (5, 6). These changes are  
42 associated with a transient decrease in cortical inhibition, initiated by MD itself (7, 8). Closure of  
43 the critical period for ODP is thought to involve restoration of “mature” levels of cortical  
44 inhibition, which disrupts subsequent competitive plasticity of excitatory inputs (9-12).

45 ODP is a well-established model of amblyopia, a visual disorder which is caused by  
46 imbalanced input to V1 from the two eyes in childhood. Amblyopia leads to long-term disruption  
47 of binocular vision and poor visual acuity in adulthood (13-16). Standard clinical interventions to  
48 promote vision recovery in amblyopia include dominant eye patching and – more recently -  
49 intensive binocular experience (17-22). There remains significant debate regarding whether  
50 binocular or monocular interventions are superior at restoring vision to amblyopic children – with  
51 direct comparisons in patient populations in randomized clinical trials yielding conflicting results  
52 (14, 22, 23). Animal models have also been used to address this question, to assess how visual  
53 experiences affect recovery of V1 function following MD. For example, reverse occlusion (RO;  
54 analogous to dominant eye patching) induces slower (or less) recovery in developing cat V1  
55 than binocular recovery (BR) after a period of MD, suggesting that temporally correlated input to  
56 the two eyes benefits overall recovery (24-28). Moreover, a single day of BR has been shown to  
57 restore binocularity of intrinsic signal responses in mouse V1 after MD, with a day of RO has  
58 less effect (29). Available electrophysiological data on visual recovery in adult rodents following  
59 MD suggests a similar benefit to BR over RO (30-32). However, it is unclear what changes to  
60 the V1 network (e.g. in the visual responses of excitatory vs. inhibitory neurons) mediate these  
61 differences. It is also unclear whether during the critical period, multi-day BR and RO  
62 experiences of identical duration and quality (e.g., with identical contrast and spatial frequency)  
63 have quantitatively different effects on these neuronal responses.

64 Sleep has been shown to benefit processes relying on synaptic plasticity, including ODP  
65 in V1 (7, 33-38). In cat V1, initial shifts in ocular dominance following a brief period of MD are  
66 augmented by a few hours of subsequent sleep (36) and are disrupted by sleep deprivation  
67 (SD) (35). This might suggest that sleep following visual experience could play a vital role in  
68 recovery of visual function in amblyopia. However, very little is known about the role of sleep in

69 promoting V1 functional recovery following MD. In a single study in critical period cats, a period  
70 of sleep following a brief interval of post-MD RO actually impaired (rather than enhanced)  
71 recovery of normal V1 ocular dominance (39). Thus the function of appropriately-timed sleep in  
72 promoting (or disrupting) vision recovery in amblyopia is completely unknown.

73 To address these questions, we first directly compared how multi-day, post-MD BR and  
74 RO - of identical duration and visual stimulus content - affect recovery of function in mouse  
75 binocular V1 (bV1). Using single-neuron recordings, we find that bV1 ocular dominance shifts  
76 caused by 5-day MD are completely reversed by a period of visually-enriched BR experience,  
77 but are only partially reversed by RO of similar duration and quality. These differential effects  
78 were observed in both regular spiking (RS) neurons and fast spiking (FS; putative parvalbumin-  
79 expressing [PV+]) interneurons. BR, but not RO, reversed MD-induced depression of DE-driven  
80 firing rate responses in both RS neurons and FS interneurons, and increases in SE-driven  
81 responses in both RS and FS populations. Recovery of function was confirmed with  
82 immunohistochemistry for DE-driven cFos expression in bV1 PV+ interneurons. DE-driven cFos  
83 expression across layers 2/3, and particularly in PV+ interneurons, was reduced after MD, and  
84 recovered to control levels after BR, but not RO. Critically, BR-driven recovery of ocular  
85 dominance, visual response changes, and DE-driven cFos expression were all disrupted by SD  
86 in the hours immediately following periods of BR. Together these results suggest that optimal  
87 recovery of bV1 function after a period of MD requires both enriched binocular visual experience  
88 and subsequent undisturbed sleep. These data have important implications for the treatment of  
89 amblyopia, which results from similar ODP mechanisms to those present in bV1 during and after  
90 MD.

91

## 92 **Results**

### 93 **Binocular recovery (BR) causes more complete reversal of MD-induced bV1 ocular** 94 **dominance shifts more than identical-duration reverse occlusion (RO)**

95 We first directly compared the degree of visual recovery induced by multi-day BR and  
96 RO in bV1 neurons following a 5-day period of MD (**Fig. 1A**). The duration and timing of MD  
97 (P28-33; during the peak of the critical period for ODP) was chosen with the aim of inducing a  
98 robust ocular dominance shift, with changes to both DE and SE responses in bV1 (5). To  
99 ensure comparable quality and duration of visual experience between BR and RO recovery  
100 groups, from P33-38, these mice were placed for 4 h/day (starting at lights-on) in a square  
101 chamber surrounded by four LED monitors presenting high-contrast, phase-reversing gratings  
102 (8 orientations, 0.05 cycles/deg, reversing at 1 Hz) in an interleaved manner. During this period

103 of visual enrichment, mice had access to a running wheel, manipulanda, and treats (31) in order  
104 to increase wake time and promote more consistent visual stimulation. After the 5-day recovery  
105 period, we compared bV1 neurons' visual responses for stimuli presented to either the right or  
106 left eyes, for the hemisphere contralateral to the original DE.

107 Consistent with previous reports (1, 5), 5-day MD induced a large ocular dominance shift  
108 in favor of the SE compared to normally-reared (NR) control mice with binocular vision from  
109 birth (**Fig. 1B-D**). 5 days of BR visual experience returned bV1 ocular dominance to a  
110 distribution similar to age-matched NR mice, completely reversing the effects of MD. After BR,  
111 ocular dominance index distributions (**Fig. 1C**) and contralateral bias indices for each mouse  
112 (**Fig. 1D**) matched those of NR mice, showing a preference for the DE (contralateral) eye. In  
113 contrast, ocular dominance distributions following 5-day RO visual experience were  
114 intermediate between MD mice and age-matched NR mice (**Fig. 1B-D**), suggesting only partial  
115 recovery.

116 MD is known to effect a change in the balance of activity between principal (RS; mainly  
117 glutamatergic) neurons and FS (mainly PV+, GABAergic) interneurons (7, 8, 40). In our  
118 extracellular recordings, FS interneurons (identifiable based on distinctive spike waveform  
119 features (7, 41)) represented roughly 15-20% of all stably-recorded neurons, across all  
120 treatment conditions (**Fig. 1E**). We found that relative to neurons recorded from NR mice, MD  
121 led to similar ocular dominance shifts toward the SE in both RS neurons and FS interneurons  
122 (**Fig. 1F and 1G**). These MD-induced changes were completely reversed in both RS and FS  
123 populations in BR mice, but were only partially reversed in RO mice (**Fig. 1F and 1G**). We  
124 conclude that with respect to ocular dominance distributions in bV1, 5-day BR is quantitatively  
125 superior to 5-day RO at reversing effects of MD.

126

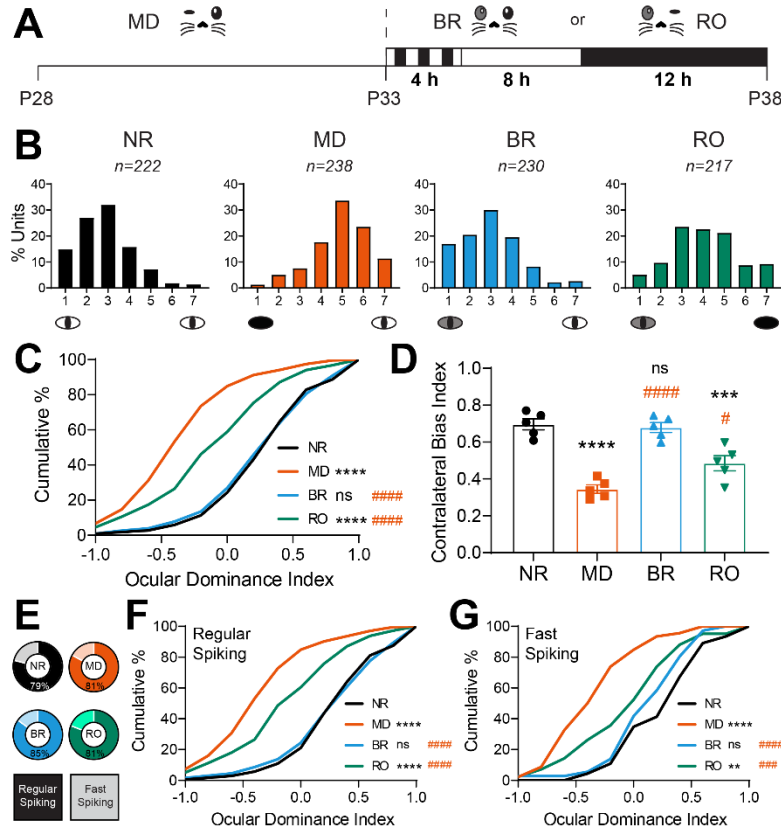

127

128 **Fig. 1. BR is more effective than RO at reversing MD-induced ocular dominance shifts.** (A) Experimental  
 129 design. Mice underwent 5-day MD from P28-P33. MD mice were recorded at P33. Two recovery groups with either  
 130 binocular recovery (BR) or reverse occlusion (RO) visual experience from P33-38 had daily 4-h periods of visual  
 131 enrichment starting at lights on and were recorded at P38. Normally-reared (NR) mice were recorded at P38 without  
 132 prior manipulation of vision. (B) Ocular dominance histograms from bV1 neurons recorded contralateral to the original  
 133 DE for all four groups, using a 7-point scale (1= neurons driven exclusively by contralateral eye; 7= neurons driven  
 134 exclusively by ipsilateral eye, 4= neurons with binocular responses)  $n = 5$  mice/group. (C) Cumulative distribution of  
 135 ocular dominance indices for all neurons recorded in each group. \*\*\*\* (black) indicates  $p < 0.0001$ , K-S test vs. NR;  
 136 ##### (red) indicates  $p < 0.0001$ , K-S test vs MD; ns indicates not significant. (D) Contralateral bias indices for mice in  
 137 each treatment group. One-way ANOVA:  $F(3, 16) = 29.34$ ,  $p < 0.0001$ . Tukey's *post hoc* test vs NR – MD:  $p <$   
 138  $0.0001$ ; BR:  $p = ns$ ; RO:  $p < 0.001$ . Tukey's *post hoc* test vs MD – BR:  $p < 0.0001$ ; RO:  $p < 0.01$ . Error bars indicate  
 139 mean  $\pm$  SEM. (E) The proportion of recorded neurons classified as regular spiking (RS) neurons and fast-spiking (FS)  
 140 interneurons in each treatment group. RS neurons: NR ( $n = 175$ ); MD ( $n = 192$ ); BR ( $n = 196$ ); RO ( $n = 175$ ). FS  
 141 interneurons: NR ( $n = 47$ ); MD ( $n = 46$ ); BR ( $n = 34$ ); RO ( $n = 42$ ). (F-G) Ocular dominance index cumulative  
 142 distributions for RS neurons (F) and FS interneurons (G). Ocular dominance index values for both populations were  
 143 significantly shifted in favor of the SE after MD, were comparable to those of NR mice after BR, and were  
 144 intermediate – between NR and MD values – after RO. \*\* and \*\*\*\* (black) indicate  $p < 0.01$  and  $p < 0.0001$ , K-S test  
 145 vs. NR; ### and ##### (red) indicate  $p < 0.001$  and  $p < 0.0001$ , K-S test vs MD.

146

147 **BR and RO differentially restore bV1 RS neuron and FS interneuron firing rate responses**  
148 **after MD**

149 MD leads to sequential changes in V1 neurons' responses to DE and SE stimulation  
150 (which are depressed and potentiated, respectively) (5-7, 36, 42). We next investigated which of  
151 these changes could be reversed in bV1 neurons as a function of post-MD BR or RO.  
152 Consistent with previous reports (5, 6), 5-day MD reduced the magnitude of DE-driven visually-  
153 evoked firing rate responses across bV1. Depression of DE responses was partially reversed  
154 after either BR or RO recovery experience (**Fig. 2 – Figure supplement 1A**). Potentiation of SE  
155 responses was partially reversed by RS, and completely reversed after BR (**Fig. 2 – Figure**  
156 **supplement 1B**). To better characterize microcircuit-level changes due to MD, we examined  
157 how DE and SE response recovery varied between RS neuron and FS interneuron populations,  
158 and in different layers of bV1. DE responses were significantly depressed after 5-day MD as  
159 previously reported (5, 6); these changes were seen across cortical layers, in both RS neurons  
160 (**Fig. 2A top**, and **2B**) and FS interneurons (**Fig. 2D top** and **2E**). In both populations, DE  
161 response depression was most pronounced in the extragranular layers. Both BR and RO both  
162 largely reversed DE response depression in RS neurons, although modest differences remained  
163 after RO (**Fig. 2A top**); recovery appeared most complete in RS neurons in layers 5/6 (**Fig. 2B**).  
164 DE response depression in FS interneurons was fully reversed by 5-day BR (**Fig. 2D top**), with  
165 the most dramatic changes occurring in the extragranular layers (**Fig. 2E**). In comparison,  
166 response depression reversal was more modest (though still significant) after RO (**Fig. 2D top**),  
167 with the largest changes occurring in layer 4 FS interneurons (**Fig. 2E**).

168 MD strongly potentiated responses to SE stimulation, across both bV1 neuron  
169 populations, and across cortical layers (**Fig. 2A bottom**, **2C**, **2D bottom**, and **2F**). BR and RO  
170 had differential effects with respect to reversing MD-potentiated responses. For both RS  
171 neurons and FS interneurons (**Fig. 2A bottom** and **2D bottom**), potentiation of SE responses  
172 was almost completely reversed by BR. In contrast, in both neuron populations, RO led to only  
173 partial reversal of MD-induced SE response potentiation (**Fig. 2A bottom** and **2D bottom**).  
174 After BR, reversal of SE response potentiation was present in RS neurons across bV1 layers. In  
175 contrast, after RO, SE responses remained significantly potentiated in layer 4 and layers 5/6  
176 (**Fig. 2C**). Among FS interneurons, BR tended to reverse SE response potentiation more  
177 completely than RO across all layers of bV1, with the most complete reversal (leading to  
178 significant differences from MD alone) seen in layer 4 (**Fig. 2F**).

179



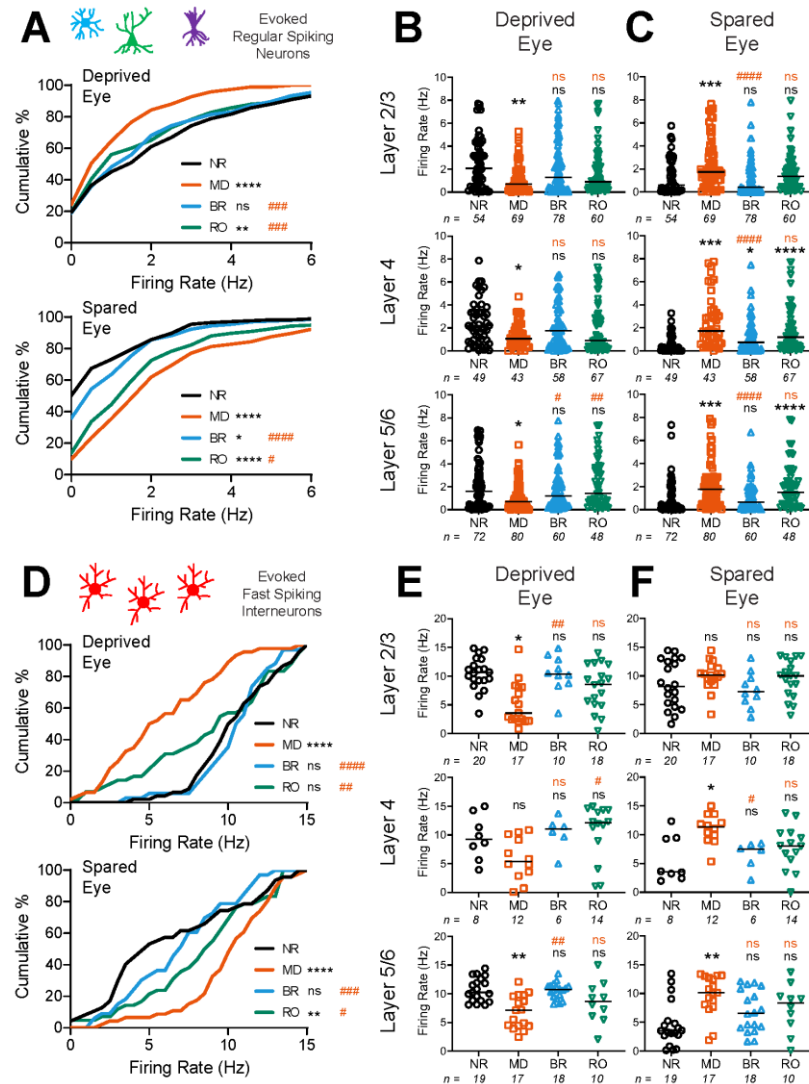

180  
 181 **Fig. 2. BR and RO differentially reverse MD-induced changes in DE and SE firing rate responses among RS**  
 182 **neurons and FS interneurons. (A)** Cumulative distributions of maximal DE (top) and SE (bottom) visually-evoked  
 183 firing rate responses for bV1 RS neurons. DE responses were significantly depressed after 5-day MD; this was  
 184 reversed fully after BR and partially after RO. SE responses in RS neurons showed post-MD potentiation, which was  
 185 maintained after RO, but largely reversed by BR. \*, \*\*, and \*\*\*\* (black) indicate  $p < 0.05$ ,  $p < 0.01$ , and  $p < 0.0001$ ,  
 186 K-S test vs. NR; #, ### and ##### (red) indicate  $p < 0.05$ ,  $p < 0.001$ , and  $p < 0.0001$ , K-S test vs MD. **(B-C)** RS  
 187 neurons' DE **(B)** and SE **(C)** visually-evoked responses recorded from neurons in bV1 layers 2/3, 4, or 5/6. Solid lines  
 188 indicate median values for each neuron population. \*, \*\*, \*\*\*, and \*\*\*\* (black) indicate  $p < 0.05$ ,  $p < 0.01$ ,  $p < 0.001$ ,  
 189 and  $p < 0.0001$ , Dunn's *post hoc* test vs. NR; #, ##, and ##### (red) indicate  $p < 0.05$ ,  $p < 0.01$  and  $p < 0.0001$ , Dunn's  
 190 *post hoc* test vs MD.  $p < 0.01$ ,  $< 0.05$ , and  $< 0.01$  for DE responses recorded in layers 2/3, 4, and 5/6, respectively;  $p$   
 191  $< 0.0001$  for SE responses recorded in all layers, Kruskal-Wallis test. **(D)** Cumulative distributions of maximal DE  
 192 **(top)** and SE **(bottom)** visually-evoked firing rate responses for FS interneurons. DE and SE responses were  
 193 depressed and potentiated, respectively, after MD. These response changes were partially reversed by RO, and fully  
 194 reversed by BR. \*\* and \*\*\*\* (black) indicate  $p < 0.01$  and  $p < 0.0001$ , K-S test vs. NR; #, ##, ###, and ##### (red)  
 195 indicate  $p < 0.05$ ,  $p < 0.01$ ,  $p < 0.01$ , and  $p < 0.0001$ , K-S test vs MD. **(E-F)** FS interneurons' DE **(E)** and SE **(F)**



196 visually-evoked responses recorded from neurons in each bV1 layer. \* and \*\* (black) indicate  $p < 0.05$  and  $p < 0.01$ ,  
 197 Dunn's *post hoc* test vs. NR; # and ## (red) indicate  $p < 0.05$  and  $p < 0.01$ , Dunn's *post hoc* test vs MD.  $p < 0.001$ , <  
 198 0.05, < 0.001 for DE responses recorded in layers 2/3, 4, and 5/6, respectively;  $p = ns$ , < 0.01, and < 0.01 for SE  
 199 responses recorded in layers 2/3, 4, and 5/6 respectively, Kruskal-Wallis test.

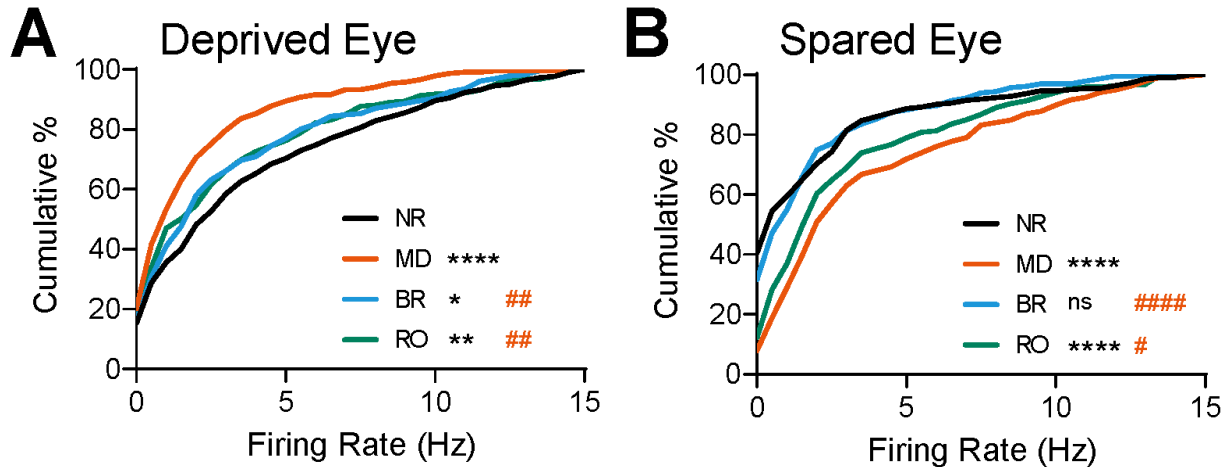

200  
 201 **Fig. 2 – Figure supplement 1. DE and SE maximal evoked firing rate distributions for all recorded bV1**  
 202 **neurons.** Cumulative distributions of maximal DE (A) and SE (B) visually-evoked firing rate responses for RS  
 203 neurons and FS interneurons combined. \*, \*\*, and \*\*\*\* (black) indicate  $p < 0.05$ ,  $p < 0.01$  and  $p < 0.0001$ , K-S test vs.  
 204 NR; #, ##, and #### (red) indicates  $p < 0.05$ ,  $p < 0.01$ , and  $p < 0.0001$ , K-S test vs MD.

205  
 206 **BR, but not RO, fully restores DE-driven cFos expression in bV1 layers 2/3**

207 To further characterize how MD, BR, and RO affect visual responses throughout bV1,  
 208 we used immunohistochemistry to quantify DE-driven cFos expression in PV+ interneurons and  
 209 non-PV+ neurons. Mice were treated as shown in **Fig. 1**, after which they were returned to the  
 210 visual enrichment arena for 30 min of visual stimulation of the DE only, then were perfused 90  
 211 min later. Visually-driven expression of cFos and PV expression were quantified across the  
 212 layers of bV1 contralateral to the DE. Consistent with previous reports (43, 44), DE-driven cFos  
 213 expression was significantly reduced across bV1 after MD (**Fig. 3A**). Both total density of cFos+  
 214 neurons and the density of cFos+ PV+ interneurons decreased after MD. BR reversed these  
 215 changes, restoring DE-driven cFos expression to levels seen in NR control mice (**Fig. 3A** and  
 216 **3C**). In contrast, and consistent with data shown in **Fig. 2A** and **2D**, both total DE-driven cFos  
 217 expression and density of cFos+ PV+ interneurons remained significantly reduced after RO.  
 218 Quantification of cFos and PV by layer showed that the largest differential effects of visual  
 219 experience were seen in layers 2/3. Following MD, DE-driven cFos expression was reduced  
 220 across all layers (**Fig. 3D**), and cFos+ PV+ interneuron density was dramatically reduced in  
 221 layers 2/3 (and to a lesser extent, layer 4) (**Fig. 3F**). RO restored DE-driven cFos expression in

222 layer 4 and layers 5/6, but not layers 2/3 (**Fig. 3D** and **3F**). After BR, total and PV+ interneuron  
 223 cFos expression was renormalized across all layers, including layer 2/3, where cFos+ neuron  
 224 density was restored to levels seen in NR mice. Together, these data suggest that activity-  
 225 driven plasticity in layer 2/3, particularly in PV+ interneurons, may differ dramatically during  
 226 monocular vs. binocular recovery from MD.

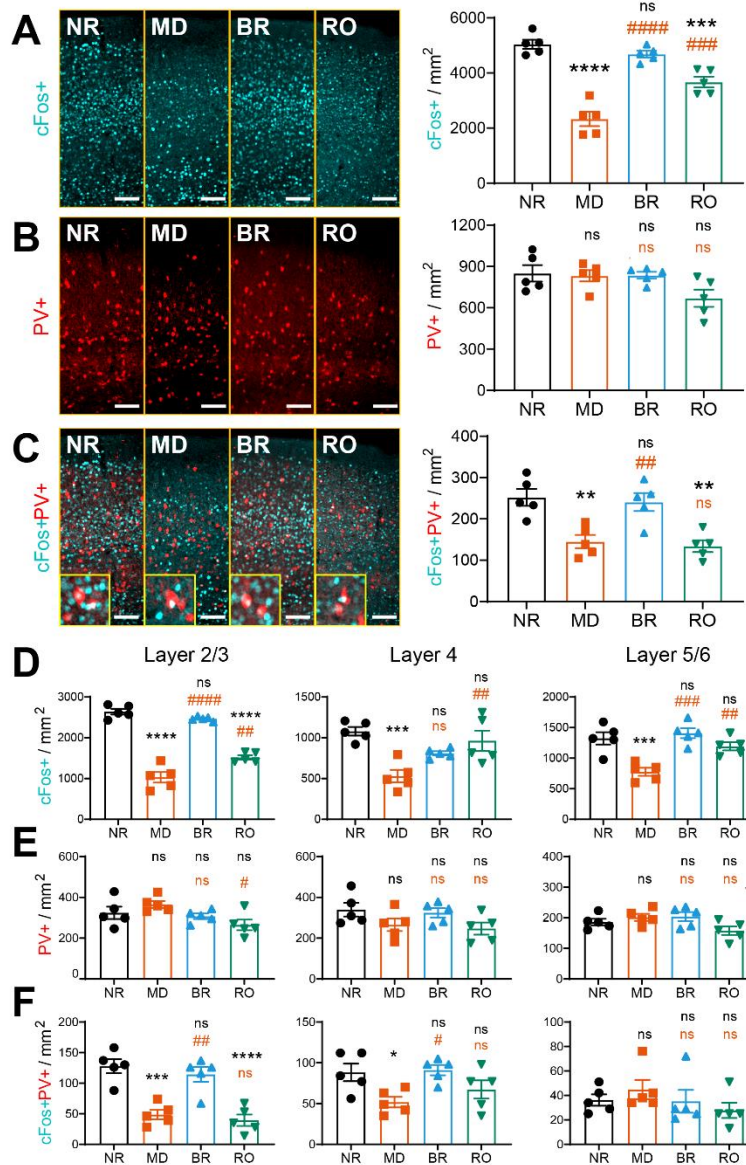

227  
 228 **Fig. 3. DE-driven cFos expression is reduced after MD and restored after BR, but not RO.** (A) Representative  
 229 images of bV1 cFos (cyan) across treatment groups following DE stimulation. Mice ( $n = 5/\text{treatment group}$ ) received  
 230 DE-only visual stimulation for 30 min, then were returned to their home cages for 90 min prior to perfusion. DE-driven  
 231 cFos+ neuron density was decreased in bV1 after MD. cFos expression was fully rescued after BR and partially  
 232 rescued after RO. One-way ANOVA:  $F(3, 16) = 39.65, p < 0.0001$ ; \*\*\* and \*\*\*\* (black) indicate  $p < 0.001$  and  $p <$   
 233  $0.0001$ , Tukey test vs. NR; ### and #### (red) indicate  $p < 0.001$  and  $p < 0.0001$ , Tukey test vs. MD. (B)  
 234 Representative image of parvalbumin (PV) [red] following DE stimulation. Density of PV+ bV1 interneurons was

235 similar between groups. One-way ANOVA:  $F(3, 16) = 2.99$ ,  $p = 0.062$ . **(C)** cFos+ PV+ interneuron density decreased  
236 with MD and recovered with BR, but not RO. One-way ANOVA:  $F(3, 16) = 11.40$ ,  $p = 0.0003$ ; \*\* (black) indicates  $p <$   
237  $0.01$ , Tukey test vs. NR; ## (red) indicates  $p < 0.01$ , Tukey test vs MD. **(D)** cFos+ neuron density in bV1 layers 2/3, 4,  
238 and 5/6. One-way ANOVA for layers 2/3, 4, or 5/6, respectively:  $F(3, 16) = 95.41$ ,  $p < 0.0001$ ,  $F(3, 16) = 9.093$ ,  $p =$   
239  $0.001$ , and  $F(3, 16) = 12.35$ ,  $p = 0.0002$ . **(E)** PV+ interneuron density in bV1 layers 2/3, 4, and 5/6. One-way ANOVA  
240 for layers 2/3, 4, or 5/6, respectively:  $F(3, 16) = 3.40$ ,  $p = 0.044$ , ns, and ns. **(F)** cFos+PV+ interneuron density in  
241 bV1 layers 2/3, 4, and 5/6. One-way ANOVA for layers 2/3, 4, or 5/6, respectively:  $F(3, 16) = 18.88$ ,  $p < 0.0001$ ,  $F(3,$   
242  $16) = 4.25$ ,  $p = 0.022$ , and ns. \*, \*\*\*, and \*\*\*\* (black) indicate  $p < 0.05$ ,  $p < 0.001$ , and  $p < 0.0001$ , Tukey test vs. NR;  
243 #, ##, ### and #### (red) indicate  $p < 0.05$ ,  $p < 0.01$ ,  $p < 0.001$ , and  $p < 0.0001$ , Tukey test vs MD. Error bars  
244 indicate mean  $\pm$  SEM. Scale bar = 100  $\mu$ m.

245

## 246 **Sleep in the hours following BR visual experience is necessary for ocular dominance** 247 **recovery**

248 Initial shifts in ocular dominance in favor of the SE are promoted by periods of sleep  
249 following monocular visual experience (7, 35, 36, 45). However, it is unclear whether, or how,  
250 sleep contributes to bV1 functional recovery after MD. Because 5-day BR (with 4 h of binocular  
251 visual enrichment per day) was effective at reversing many of the effects of prior MD, we tested  
252 whether post-visual enrichment sleep plays an essential role in this recovery. Mice underwent  
253 the same 5-day MD and 5-day BR periods shown in **Fig. 1**. Following each daily visual  
254 enrichment period, mice were returned to their home cage, and over the next 4 h were either  
255 sleep deprived (SD) under dim red light (to prevent additional visual input to V1) or allowed *ad*  
256 *lib* sleep (BR+SD and BR+Sleep, respectively; **Fig. 4A**). We then compared bV1 neurons' visual  
257 responses for stimuli presented to either the right or left eyes, for the hemisphere contralateral  
258 to the original DE, between BR+Sleep and BR+SD mice. In contrast to prior reports on the  
259 effects of SD following RO in critical period cats (39), we found that SD in the hours following  
260 daily BR visual experience reduced post-MD recovery of ocular dominance in favor of the  
261 original DE (**Fig. 4B**). Ocular dominance index and contralateral bias index values for bV1  
262 neurons recorded from BR+SD mice were significantly reduced compared to those of BR+Sleep  
263 mice, indicating reduced DE preference similar to that seen after MD alone (**Fig. 4C-D**). These  
264 effects of SD on ocular dominance recovery across BR were present in both RS neurons and  
265 FS interneurons in bV1 (**Fig. 4E-G**). Thus, in the context of BR-mediated recovery from MD,  
266 post-experience sleep plays an essential role in recovery of ocular dominance in bV1.

267

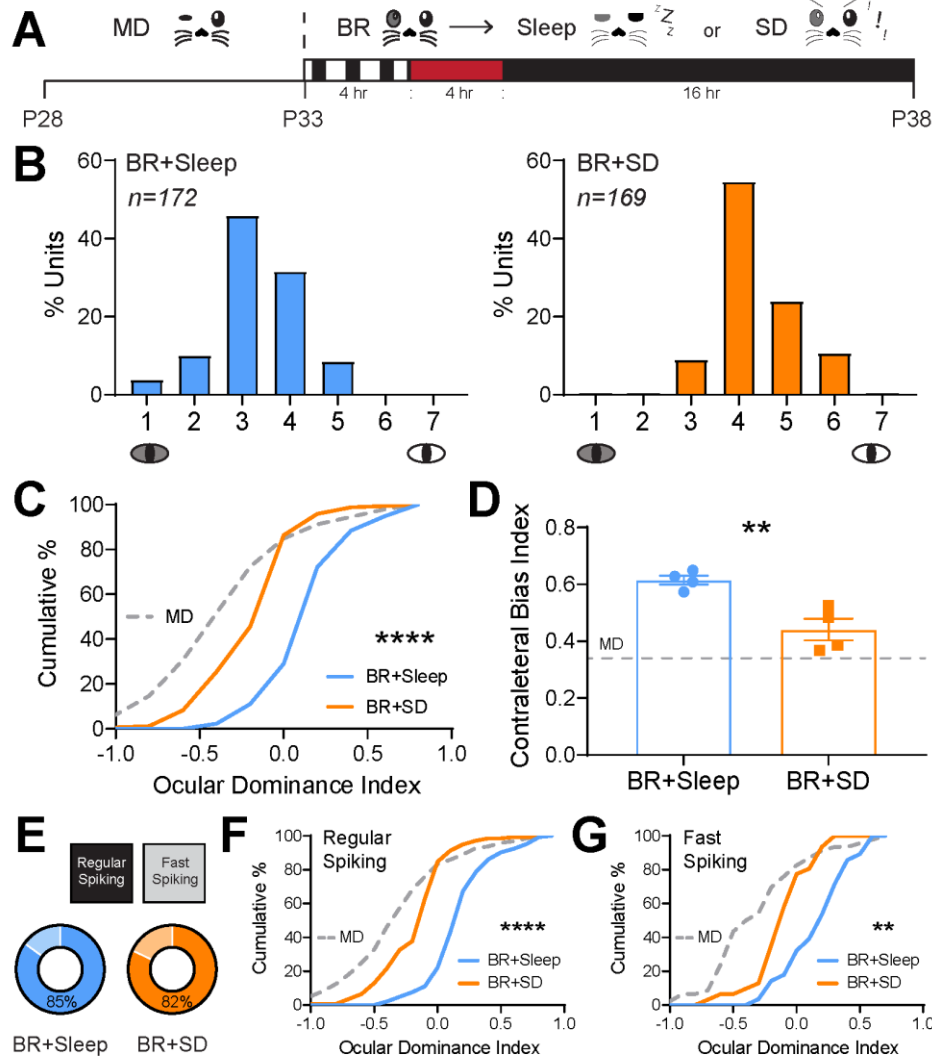

268

269 **Fig. 4. Sleep loss following BR visual experience prevents ocular dominance shifts. (A)** Experimental design.

270 Mice underwent 5-day MD and 5-day BR; each day after 4-hr BR, BR+Sleep mice were returned to their home cage

271 and allowed *ad lib* sleep under infrared light, BR+SD mice underwent 4 hours of sleep deprivation through gentle

272 handling under infrared light. **(B)** Ocular dominance histograms for bV1 neurons recorded from BR+Sleep and

273 BR+SD groups (4 mice/group). **(C)** Cumulative distribution of ocular dominance index values for bV1 neurons

274 recorded from BR+Sleep and BR+SD mice. \*\*\*\* indicates  $p < 0.0001$ , K-S test. Values from neurons recorded in MD-

275 only mice from **Fig. 1** are shown (dashed gray lines) for comparison. **(D)** Contralateral bias index values were

276 reduced for bV1 neurons recorded from BR+SD mice. Unpaired t-test:  $p = 0.0059$ . Error bars indicate mean  $\pm$  SEM.

277 **(E)** Proportion of recorded neurons identified as RS neurons or FS interneurons for the two groups. **(F-G)** Ocular

278 dominance index values for recorded RS neurons **(F)** and FS interneurons **(G)** were reduced in BR+SD mice. \*\* and

279 \*\*\*\* indicate  $p < 0.01$  and  $p < 0.0001$ , K-S test.

280

281 **BR-mediated renormalization of DE and SE responses are reversed by sleep loss**

282 To determine how SD affects visual responsiveness in DE and SE pathways, we  
283 assessed how visually-evoked firing rates were affected by post-BR sleep vs. SD. In both RS  
284 neurons and FS interneurons, post-BR SD led to a significant reduction of DE firing rate  
285 responses compared with those recorded from freely-sleeping mice (**Fig. 5A top** and **4D top**).  
286 When DE responses were compared across bV1 as a whole, those recorded from BR+SD mice  
287 were significantly lower than those recorded from BR+Sleep mice, similar to those recorded  
288 from mice after MD alone. Among RS neurons, we found that this effect was most pronounced  
289 in layers 2/3, where DE-driven firing rates in BR+SD mice were similar to those recorded from  
290 MD mice (**Fig. 5B**). Among FS interneurons, SD effects were most pronounced in layer 4,  
291 where depressed DE responses were similar to those of MD-only mice (**Fig. 5E**).

292 Across bV1 as a whole, RS neurons' SE responses were not significantly different  
293 between BR+Sleep and BR+SD mice, despite a trend for higher firing rate responses after SD  
294 (**Fig. 5A bottom**). SE responses were significantly elevated in RS neurons recorded in layer 4  
295 and layers 5/6 from BR+SD mice, where median response rates were similar to those recorded  
296 in MD-only mice (**Fig. 5C**). Across the bV1 FS interneuron population, SD interfered with BR-  
297 driven normalization of SE responses, which remained elevated, similar to those recorded from  
298 mice following MD alone (**Fig. 5D bottom**). FS interneurons' SE responses in BR+SD mice  
299 were significantly elevated relative to BR+Sleep mice in layers 5/6, with median firing rate  
300 responses similar to those seen in MD-only mice (**Fig. 5F**). Together, these data suggest that  
301 eye-specific response renormalization due to BR in both RS neurons and FS interneurons is  
302 suppressed by post-BR SD.

303

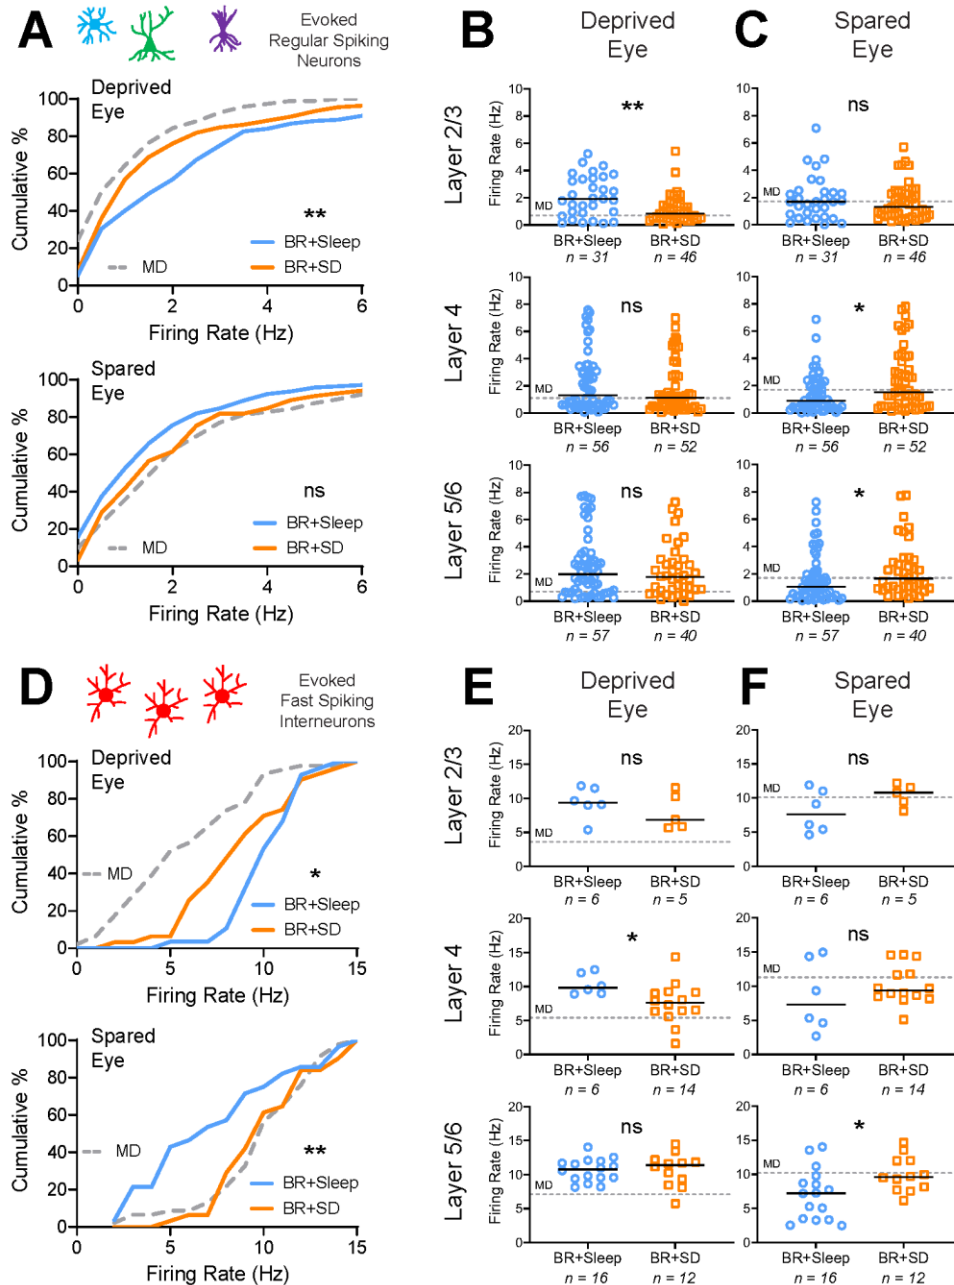

304

305 **Fig. 5. Post-BR SD prevents recovery of DE and SE responses after MD.** (A) Cumulative distributions of maximal  
 306 DE (top) and SE (bottom) visually-evoked firing rate responses for bV1 RS neurons. DE firing rate responses were  
 307 significantly decreased in BR+SD mice relative to BR+Sleep mice. \*\* indicates  $p < 0.01$ , K-S test. (B-C) RS neurons'  
 308 DE (B) and SE (C) visually-evoked responses recorded from neurons in bV1 layers 2/3, 4, or 5/6. Solid lines indicate  
 309 median values for each neuron population; \* and \*\* indicate  $p < 0.05$  and  $p < 0.01$ , Mann-Whitney test. (D)  
 310 Cumulative distributions of maximal DE (top) and SE (bottom) visually-evoked firing rate responses for bV1 FS  
 311 interneurons. Firing rate responses for DE and SE stimulation were significantly decreased and increased,  
 312 respectively, in BR+SD mice. \* and \*\* indicate  $p < 0.05$  and  $p < 0.01$ , K-S test. (E-F) FS interneurons' DE (E) and SE  
 313 (F) visually-evoked responses recorded from neurons in bV1 layers 2/3, 4, or 5/6. Solid lines indicate median values



314 for each neuron population. \* indicates  $p < 0.05$ , Mann-Whitney test. Values for the MD-only condition (gray dashed  
315 lines) from **Fig. 2** are shown for comparison.

316

317 To further characterize layer- and cell type-specific changes in visual responses after  
318 post-BR sleep vs. SD, we next quantified DE-driven cFos expression in bV1 of BR+Sleep and  
319 BR+SD mice, using the same DE visual stimulation strategy described for **Fig. 3**. Across bV1 as  
320 a whole, overall DE-driven cFos expression was significantly reduced in BR+SD mice compared  
321 to BR+Sleep mice (**Fig. 6A**). This reduction was most dramatic in layers 2/3 and 5/6 (**Fig. 6D**),  
322 where cFos levels in BR+SD mice were intermediate between those of BR+Sleep and MD-only  
323 mice. The density of cFos+ PV+ interneurons was likewise significantly decreased after DE  
324 stimulation in BR+SD mice (**Fig. 6C**), with dramatic reductions in layers 2/3 and 4 (**Fig. 6F**).  
325 Taken together, out data suggest that most of the changes to DE and SE responses initiated in  
326 bV1 by MD are sustained when BR is followed by SD. Conversely, BR-mediated recovery of  
327 binocular function in bV1 RS neurons and FS interneurons relies on post-BR sleep.

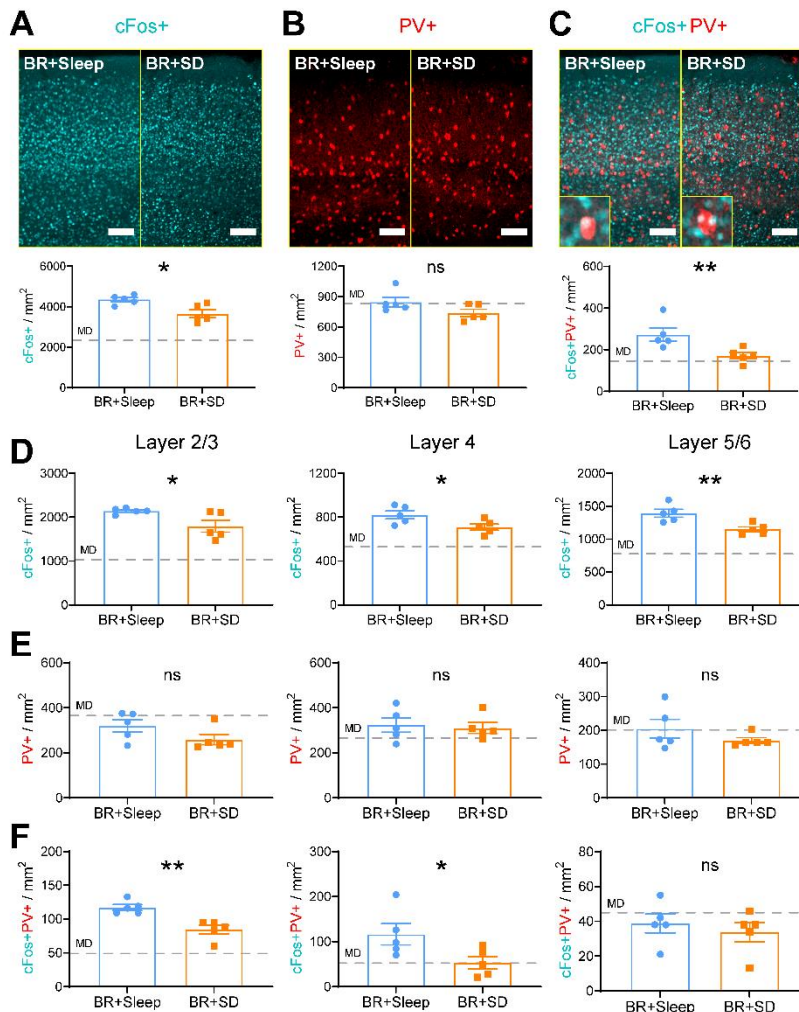

328



329 **Fig. 6. Post-BR SD prevents recovery of DE-driven cFos expression in bV1 (A)** bV1 cFos (cyan) after DE  
330 stimulation in BR+Sleep and BR+SD mice. Mice ( $n = 5$ /treatment group) received DE-only visual stimulation for 30  
331 min, then were returned to their home cages for 90 min prior to perfusion. DE-driven cFos+ neuron density was  
332 reduced in BR+SD mice relative to BR+Sleep mice. Unpaired t-test:  $p < 0.05$ . **(B)** PV immunostaining (red) was  
333 similar between groups. **(C)** cFos+ PV+ interneuron density was decreased in BR+SD mice relative to BR+Sleep  
334 mice. Unpaired t-test:  $p < 0.01$ . **(D)** cFos+ neuron density was reduced in bV1 layers 2/3, 4, and 5/6 after BR+SD  
335 relative to BR+Sleep. Unpaired t-test:  $p < 0.05$ ,  $p < 0.05$ , and  $p < 0.01$ , respectively. **(E)** PV+ interneuron density in  
336 bV1 layers 2/3, 4, and 5/6 was similar between groups. **(F)** cFos+ PV+ interneuron density was reduced in bV1 layers  
337 2/3 and 4 in BR+SD mice relative to BR+Sleep mice. Unpaired t-test:  $p < 0.05$ ,  $p < 0.05$ , and ns, respectively. Scale  
338 bar = 100  $\mu$ m. Values for the MD-only condition (gray dashed lines) from **Fig. 3** are shown for comparison.

339

## 340 Discussion

341 In this study, we compared the effects of equal-duration, qualitatively-similar binocular  
342 vs. monocular visual experience on recovery of bV1 responses following MD, using single-unit  
343 electrophysiology and immunohistochemistry. We also characterized the effects of post-  
344 experience sleep and sleep loss on these processes. Critically, a side-by-side comparison of  
345 equal-duration BR and RO clearly showed that bV1 ocular dominance shifts in favor of the SE  
346 are reversed after 5-day BR, but not 5-day RO (**Fig. 1**). This reversal is present in both RS  
347 neurons and FS interneurons, and is associated with reversal of both MD-driven DE response  
348 depression and SE response potentiation (**Fig. 2, Fig. 3**). Insofar as MD serves as a model for  
349 amblyopia caused by disruption of vision in one of the two eyes during childhood, these data  
350 add to a body of growing evidence that suggests that binocular visual experience may offer  
351 advantages over patching of the dominant eye, which until recently was the standard of care for  
352 amblyopia. However, when daily BR experience was followed by SD, recovery of normal  
353 binocular vision in bV1 after MD was nearly completely blocked (**Fig. 4-6**). This suggests that  
354 the relative timing of sleep relative to recovery experience is potentially a critical – but  
355 overlooked - consideration for the treatment of amblyopia.

356 How do BR and RO differ in their effects on the bV1 circuit? Here we find that 5-day MD  
357 causes significant DE response depression among both RS neurons and FS interneurons in  
358 bV1 – with the most dramatic depression observed in layers 2/3. These changes not only  
359 reduce firing rates, but also strongly reduce DE-driven cFos expression among PV+ and PV-  
360 neuron populations in layers 2/3. These findings are consistent with results of longitudinal  
361 calcium imaging studies in mouse V1 (8) and longitudinal electrophysiological recordings in cat  
362 V1 (7). While this response depression is completely reversed by 5-day BR, only partial  
363 recovery of DE responses is achieved with RO. Differential recovery between BR and RO is  
364 evident both at the level of firing rates (**Fig. 2**) and DE-driven cFos expression (**Fig. 3**). Across

365 the initial 5-day MD period, both FS interneurons and RS neurons also show widespread  
366 potentiation of SE responses, across all layers of bV1. These SE response changes (which are  
367 thought to occur only after DE response depression has already take place) (5, 7, 36) appear to  
368 be almost fully reversed after 5-day BR. In contrast, SE response enhancement is minimally  
369 altered after 5-day subsequent RO. In general, these findings are consistent with intrinsic signal  
370 imaging studies in binocular mouse V1, which indicated that a single day of BR is superior to  
371 RO at restoring binocularity (29). Future studies will be needed to determine the extent to which  
372 initial eye-specific response changes during MD are mediated by Hebbian vs. homeostatic  
373 plasticity mechanisms (46-52), and how differential outcomes with BR vs. RO themselves reflect  
374 Hebbian vs. homeostatic changes within bV1.

375         How does post-experience sleep or sleep loss affect bV1 during recovery? Our data  
376 clearly demonstrate that following periods of BR experience, subsequent sleep is essential for  
377 full recovery of MD-driven changes in ocular dominance (**Fig. 4**), DE and SE firing rate  
378 responses (**Fig. 5**), and DE-driven cFos expression (**Fig. 6**). These are the first data  
379 demonstrating that following MD, sleep plays a critical role in restoring normal visual function.  
380 Prior work has shown that post-MD sleep is essential for initial ocular dominance shifts in favor  
381 of the spared eye (7, 35-38) and for MD-induced structural plasticity in V1 neurons (45).  
382 However, the role of sleep in promoting recovery of function following the onset of amblyopia is  
383 understudied. Prior work done in cats after brief RO indicated that post-RO SD had little impact  
384 – and even tended to reduce recovery of binocular vision (39). Less is known about interactions  
385 between BR visual experience and subsequent sleep. While post-BR sleep has been suggested  
386 to promote homeostatic downscaling of firing rates in rodent monocular zone (53), no prior work  
387 has addressed how it affects bV1 ODP. The present work characterizes how sleep contributes  
388 to experience-driven recovery of binocular vision in bV1. We find that post-BR sleep is required  
389 for reversal of both DE response depression and SE response potentiation, in both RS neurons  
390 and FS interneurons. As with changes driven by initial MD (**Fig. 2-3**), changes driven by post-  
391 BR sleep appear to be most dramatic in layers 2/3 (**Fig. 5-6**).

392         Why might sleep be essential for these changes? Available data suggests that both  
393 Hebbian synaptic potentiation and weakening can occur in bV1 during post-MD sleep (7, 36, 37,  
394 54, 55) through sleep-dependent activation of specific molecular pathways (36, 37, 56) or sleep-  
395 specific activity patterns (7). It is plausible that similar mechanisms are involved in the reversal  
396 of MD-driven synaptic changes during post-BR sleep. For example, specific oscillatory  
397 patterning of neuronal firing in the V1-LGN network during sleep may be essential for spike  
398 timing-dependent plasticity between synaptically-connected neurons (33, 34, 57-60).

399 Alternatively, sleep may promote permissive changes in biosynthetic pathways that are  
400 essential for consolidating some forms of plasticity *in vivo* (61-63). In V1, sleep plays a role in  
401 increasing inhibition within layers 2/3, reducing E/I ratios across the rest phase (64); this may  
402 play a role in reversing ocular dominance changes driven by suppression of FS interneurons in  
403 the context of MD (7, 8). Finally, sleep also contributes to homeostatic changes in V1 neurons'  
404 firing rates (53, 65); thus sleep-dependent homeostatic plasticity may also contribute to bV1  
405 changes observed in BR+Sleep, but not BR+SD, mice.

406 Many factors affect the degree of ODP initiated by MD in animal models of amblyopia,  
407 including behavioral state (35, 36, 38) and neuropharmacology (10, 66-68). Emerging data  
408 suggests that these factors may also affect recovery from amblyopia (67, 69, 70). However,  
409 numerous findings have raised debate about whether dominant-eye (SE) patching, the  
410 decades-long standard of care for amblyopia, provides the optimal sensory stimulus for  
411 promoting recovery of vision (18, 22, 71, 72). Here, in side-by-side comparison of the effects of  
412 brief binocular vs. monocular recovery experience, we show the two have strikingly different  
413 effects on bV1 ocular dominance. Critically, our data also provide the first demonstration that  
414 the timing of sleep relative to visual experience during amblyopia treatment may be critical for  
415 restoring normal bV1 function. We hope that these data will inform future strategies for  
416 optimizing amblyopia treatment in children, to lessen the long-term impact of early-life visual  
417 disruptions.

418

## 419 **Materials and Methods**

### 420 **Animal housing and husbandry**

421 All mouse husbandry and experimental/surgical procedures were reviewed and  
422 approved by the University of Michigan Internal Animal Care and Use Committee. C57BL6/J  
423 mice were housed in a vivarium under 12h:12h light/dark cycles (lights on at 9AM) unless  
424 otherwise noted, and had *ad lib* access to food and water. After eyelid suture surgeries, mice  
425 were single housed in standard cages with beneficial environmental enrichment. For studies  
426 comparing the effects of sleep on BR visual experience, mice were housed with a 4h:20h  
427 light:dark cycle (lights on from 9AM-1PM during visual enrichment, dim red light outside of visual  
428 enrichment) and had *ad lib* access to food and water.

429

### 430 **Monocular deprivation, recovery, visual enrichment, and sleep deprivation**

431 For monocular deprivation (MD), mice were anesthetized at P28 using 1-1.5%  
432 isoflurane. Nylon non-absorbable sutures (Henry Schien) were used to occlude the left eye.

433 Sutures were checked twice daily to verify continuous MD; during this time they were handled 5  
434 min/day. After MD (at P33), mice were anesthetized with 1-1.5% isoflurane a second time and  
435 left eyelid sutures were removed. Mice that underwent binocular recovery (BR) were then  
436 housed over the next 5 days with both eyes open; during this time they were handled daily for 5  
437 min/day. Mice that underwent reverse occlusion (RO) had the right (previously spared; SE) eye  
438 sutured for the next 5 days; these mice were also handled 5 min/day during this period. Mice  
439 that lost sutures during the MD or recovery periods or developed eye abnormalities were  
440 excluded from the study. BR and RO mice underwent a similar 5-day period of daily enriched  
441 visual experience from P34-38. This regimen consisted of a daily placement in a 15" × 15"  
442 Plexiglas chamber surrounded by 4 high-contrast LED monitors, from ZT0 (lights on) to ZT4.  
443 Phase-reversing oriented grating stimuli (0.05 cycles/deg, 100% contrast, 1 Hz reversal  
444 frequency) of 8 orientations were presented repeatedly on the 4 monitors in a random,  
445 interleaved fashion. During this 4-h period of daily visual enrichment, mice were encouraged to  
446 remain awake and explore the chamber via presentation of a variety of enrichment toys (novel  
447 objects, transparent tubes, and a running wheel) and palatable treats. For SD studies on BR  
448 experience, following the 4-h visual enrichment period, mice were placed in their home cage  
449 under dim red light (to prevent additional visual experience), and were sleep deprived (SD) by  
450 gentle handling (57, 65). Briefly, gentle handling procedures involved visually monitoring the  
451 mice for assumption of sleep posture - i.e., huddled in their nest with closed eyes. Upon  
452 detection of sleep posture, the cage was either tapped or (if necessary) shaken briefly (1-2  
453 seconds). If sleep posture was maintained after these interventions, the nesting material within  
454 the cage would be moved using a cotton-tipped applicator. No novel objects or additional  
455 sensory stimuli were provided, to limit sensory-based neocortical plasticity during sleep  
456 deprivation procedures (73). As previously described, similar procedures used for sleep  
457 deprivation in adult mice (74) and critical period cats (38) either have no significant effect on  
458 serum cortisol, or increases it to a degree that is orders of magnitude lower than that capable of  
459 disrupting ODP (75).

460

#### 461 ***In vivo* neurophysiology and single unit analysis**

462 Mice underwent stereotaxic, anesthetized recordings using a combination of 0.5-1.0%  
463 isoflurane and 1 mg/kg chlorprothixene (Sigma). A small craniotomy (1 mm in diameter) was  
464 made over right-hemisphere bV1 (i.e., contralateral to the original DE) using stereotaxic  
465 coordinates 2.6-3.0 mm lateral to lambda. Recordings of neuronal firing responses were made  
466 using a 2-shank, linear silicon probe spanning the layers of bV1 (250 μm spacing between

467 shanks, 32 electrodes/shank, 25  $\mu\text{m}$  inter-electrode spacing; Cambridge Neurotech). The probe  
468 was slowly advanced into bV1 until stable, consistent spike waveforms were observed on  
469 multiple electrodes. Neural data acquisition using a 64-channel Omniplex recording system  
470 (Plexon) was carried out for individual mice across presentation of visual stimuli to each of the  
471 eyes, via a full field, high-contrast LED monitor positioned directly in front of the mouse.  
472 Recordings were made for the right and left eyes during randomly interleaved presentation of a  
473 series of phase-reversing oriented gratings (8 orientations + blank screen for quantifying  
474 spontaneous firing rates, reversing at 1 Hz, 0.05 cycles/degree, 100% contrast, 10 sec/stimulus;  
475 Matlab Psychtoolbox). Spike data for individual neurons was discriminated offline using  
476 previously-described PCA and MANOVA analysis (57, 65, 76, 77) using Offline Sorter software  
477 (Plexon).

478 For each visually-responsive neuron, a number of response parameters were calculated  
479 (7, 36). An ocular dominance index was calculated for each unit as  $(C-I)/(C+I)$  where C  
480 represents the maximal visually-evoked firing rate for preferred-orientation stimuli presented to  
481 the contralateral (left/deprived) eye and I represents the maximal firing rate for stimuli presented  
482 to the ipsilateral (right/spared) eye. Ocular dominance index values range from -1 to +1, where  
483 negative values indicate an ipsilateral (SE) bias, positive values indicate a contralateral (DE)  
484 bias, and values close to 0 indicate similar responses for stimuli presented to either eye.

485

## 486 **Histology and immunohistochemistry**

487 Following all electrophysiological recordings, mice were euthanized and perfused with  
488 ice cold PBS and 4% paraformaldehyde. Brains were dissected, post-fixed, cryoprotected in  
489 30% sucrose solution, and frozen for sectioning. 50  $\mu\text{m}$  coronal sections containing bV1 were  
490 stained with DAPI (Fluoromount-G; Southern Biotech) to verify electrode probe placement in  
491 bV1. Mice whose electrode placement could not be verified were excluded from further  
492 analyses.

493 For immunohistochemical quantification of PV and DE-driven cFos expression in bV1,  
494 mice from all groups underwent monocular eyelid suture of the original SE at ZT12 (lights off)  
495 the evening before visual stimulation. At ZT0 (next day), DE stimulation was carried out in the  
496 LED-monitor-surrounded arena with treats and toys to maintain a high level of arousal (as  
497 described above) Mice from all groups were exposed to a 30-min period of oriented gratings (as  
498 described for visual enrichment above), after which they were returned to their home cage for  
499 90 min (for maximal visually-driven cFos expression) prior to perfusion. Coronal sections of bV1  
500 were collected as described above and immunostained using rabbit-anti-cFos (1:1000; Abcam,

501 ab190289) and mouse-anti-PV (1:2000; Millipore, MAB1572) followed by secondary antibodies:  
502 Alexa Fluor 488 (1:200; Invitrogen, A11032) and Alexa Fluor 594 (1:200; Invitrogen, A11034).  
503 Stained sections were mounted using Prolong Gold antifade reagent (Invitrogen) and imaged  
504 using a Leica SP8 confocal microscope with a 10x objective, to obtain z-stack images (10  $\mu$ m  
505 steps) for maximum projection of fluorescence signals. Identical image acquisition settings (e.g.  
506 exposure times, frame average, pixel size) were used for all sections. cFos+ and PV+ cell  
507 bodies were quantified in 3-4 sections (spanning the anterior-posterior extent of bV1) per mouse  
508 by a scorer blinded to animal condition and reported as approximate density, using previously  
509 established procedures. Co-labeling was quantified using the Image J JACoP plugin (78) and  
510 values for each mouse are averaged across 3-4 sections.

511

## 512 **Statistical analysis**

513 Statistical analyses were carried out using GraphPad Prism software (Version 9.1).  
514 Comparisons of ocular dominance, firing rates, and visual response properties were made using  
515 stably recorded, visually-responsive units in bV1. Nonparametric tests were used for non-normal  
516 data distributions. Specific statistical tests and p-values can be found within the results section  
517 and in corresponding figures and figure legends.

518

## 519 **Acknowledgments**

520 We thank Abbey Roelofs (LSA Technology Services) for software programming  
521 assistance. This work was supported by a University of Michigan Candidate Grant and a  
522 Rackham Merit Fellowship to J.D.M., NIH R01NS104776, and a Research to Prevent Blindness  
523 Walt and Lilly Disney Award for Amblyopia Research to S.J.A.

524

## 525 **Competing Interests**

526 Authors declare they have no competing financial interests.

527

528



## 529 References

530

- 531 1. T. K. Hensch, Critical period regulation. *Annu Rev Neurosci* **27**, 549-579 (2004).
- 532 2. E. I. Knudsen, Sensitive periods in the development of the brain and behavior. *J Cogn Neurosci*  
533 **16**, 1412-1425 (2004).
- 534 3. T. N. Wiesel, D. H. Hubel, Single cell responses in striate cortex of kittens deprived of vision in  
535 one eye. *J Neurophysiol.* **28**, 1029-1040 (1963).
- 536 4. J. A. Gordon, M. P. Stryker, Experience-dependent plasticity of binocular responses in the  
537 primary visual cortex of the mouse. *J Neurosci* **16**, 3274-3286 (1996).
- 538 5. M. Y. Frenkel, M. F. Bear, How monocular deprivation shifts ocular dominance in visual cortex of  
539 young mice. *Neuron* **44**, 917-923 (2004).
- 540 6. L. Mioche, W. Singer, Chronic recordings from single sites of kitten striate cortex during  
541 experience-dependent modifications of receptive-field properties. *Journal of Neurophysiology*  
542 **62**, 185-197 (1989).
- 543 7. S. J. Aton *et al.*, Visual experience and subsequent sleep induce sequential plastic changes in  
544 putative inhibitory and excitatory cortical neurons. *Proc Natl Acad Sci U S A* **110**, 3101-3106  
545 (2013).
- 546 8. S. J. Kuhlman *et al.*, A disinhibitory microcircuit initiates critical period plasticity in visual cortex.  
547 *Nature* **501**, 543-546 (2013).
- 548 9. T. K. Hensch, Controlling the critical period. *Neuroscience Research* **47**, 17-22 (2003).
- 549 10. T. K. Hensch, E. M. Quinlan, Critical periods in amblyopia. *Vis Neurosci* **35** (2018).
- 550 11. T. K. Hensch, M. Fagiolini, "Excitatory-inhibitory balance and critical period plasticity in  
551 developing visual cortex  
552 Progress in Brain Research". (Elsevier, 2005), pp. 115-124.
- 553 12. A. Harauzov *et al.*, Reducing intracortical inhibition in the adult visual cortex promotes ocular  
554 dominance plasticity. *J Neurosci* **30**, 361-371 (2010).
- 555 13. A. L. Webber, J. Wood, Amblyopia: prevalence, natural history, functional effects and treatment  
556 *Clin Exp Optom* **88**, 365-375 (2005).
- 557 14. D. M. Levi, D. C. Knill, D. Balevier, Stereopsis and amblyopia: A mini-review. *Vis Research* **114**,  
558 17-30 (2015).
- 559 15. K. Attebo *et al.*, Prevalence and causes of amblyopia in an adult population *Ophthalmology* **105**,  
560 154-159 (1998).
- 561 16. E. E. Birch, Amblyopia and binocular vision. *Prog Retinal Eye Res* **33**, 67-84 (2013).
- 562 17. P. E. D. I. Group *et al.*, A randomized trial of increasing patching for amblyopia. *Ophthalmology*  
563 **120**, 2270-2277 (2013).
- 564 18. M. X. Repka *et al.*, A Randomized Trial of Patching Regimens for Treatment of Moderate  
565 Amblyopia in Children. *Arch Ophthalmol* **121**, 603-611 (2003).
- 566 19. T. Khan, Is There a Critical Period for Amblyopia Therapy? Results of a Study on Older  
567 Anisometropic Amblyopes *J Clin Diagn Res* **9**, NC01-04 (2015).
- 568 20. C. L. Kraus, S. M. Culican, New advances in amblyopia therapy I: binocular therapies and  
569 pharmacologic augmentation. *Br J Ophthalmol* **102**, 1492-1496 (2018).
- 570 21. C. L. Kraus, S. M. Culican, New advances in amblyopia therapy II: refractive therapies. *Br J*  
571 *Ophthalmol* **102**, 1611-1614 (2018).
- 572 22. K. R. Kelly *et al.*, Binocular iPad Game vs Patching for Treatment of Amblyopia in Children: A  
573 Randomized Clinical Trial. *JAMA Ophthalmol* **134**, 1402-1408 (2016).



- 574 23. J. M. Holmes *et al.*, Effect of a Binocular iPad Game vs Part-time Patching in Children Aged 5 to  
575 12 Years With Amblyopia: A Randomized Clinical Trial *JAMA Ophthalmol* **134**, 1391-1400 (2016).
- 576 24. J. A. Movshon, Reversal of the physiological effects of monocular deprivation in the kitten's  
577 visual cortex. *Journal of Physiology* **261**, 125-174 (1976).
- 578 25. P. C. Kind *et al.*, Correlated binocular activity guides recovery from monocular deprivation.  
579 *Nature* **416**, 430-433 (2002).
- 580 26. D. E. Mitchell, K. M. Murphy, M. G. Kaye, Labile nature of the visual recovery promoted by  
581 reverse occlusion in monocularly deprived kittens. *Proc Natl Acad Sci USA* **81**, 286-288 (1984).
- 582 27. K. M. Murphy, D. E. Mitchell, Bilateral amblyopia after a short period of reverse occlusion in  
583 kittens. *Nature* **323**, 536-538 (1986).
- 584 28. D. E. Mitchell, M. Cynader, A. J. Movshon, Recovery from the effects of monocular deprivation in  
585 kittens. *176* (1977).
- 586 29. M. Kaneko, C. E. Cheetham, Y.-S. Lee, M. P. Stryker, K. Fox, Constitutively active H-ras  
587 accelerates multiple forms of plasticity in developing visual cortex. *Proc Natl Acad Sci USA* **107**,  
588 19026-19031 (2010).
- 589 30. Q. S. Fischer, S. Aleem, H. Zhou, T. A. Pham, Adult visual experience promotes recovery of  
590 primary visual cortex from long-term monocular deprivation. *Learn Mem* **14**, 573-580 (2007).
- 591 31. K. Iny, A. J. Heynan, E. Sklar, M. F. Bear, Bidirectional modifications of visual acuity induced by  
592 monocular deprivation in juvenile and adult rats *J Neurosci* **26**, 7368-7374 (2006).
- 593 32. T. Pizzorusso *et al.*, Structural and functional recovery from early monocular deprivation in adult  
594 rats. *Proc Natl Acad Sci USA* **103**, 8517-8522 (2006).
- 595 33. C. Puentes-Mestril, J. Roach, N. Niethard, M. Zochowski, S. J. Aton, How rhythms of the sleeping  
596 brain tune memory and synaptic plasticity. *Sleep* **42**, pii: zsz095 (2019).
- 597 34. C. Puentes-Mestril, S. J. Aton, Linking network activity to synaptic plasticity during sleep:  
598 hypotheses and recent data. *Frontiers in Neural Circuits* **11**, doi: 10.3389/fncir.2017.00061  
599 (2017).
- 600 35. M. G. Frank, N. P. Issa, M. P. Stryker, Sleep enhances plasticity in the developing visual cortex.  
601 *Neuron* **30**, 275-287 (2001).
- 602 36. S. J. Aton *et al.*, Mechanisms of sleep-dependent consolidation of cortical plasticity. *Neuron* **61**,  
603 454-466 (2009).
- 604 37. J. Seibt *et al.*, Protein synthesis during sleep consolidates cortical plasticity in vivo. *Curr Biol* **22**,  
605 676-682 (2012).
- 606 38. M. C. D. Bridi *et al.*, Rapid eye movement sleep promotes cortical plasticity in the developing  
607 brain. *Science Advances* **1**, 1-8 (2015).
- 608 39. L. Dadvand, M. P. Stryker, M. G. Frank Sleep does not enhance the recovery of deprived eye  
609 responses in developing visual cortex. *Neuroscience* **143**, 815-826 (2006).
- 610 40. Y. Yazaki-Sugiyama, S. Kang, H. Cateau, T. Fukai, T. K. Hensch, Bidirectional plasticity in fast-  
611 spiking GABA circuits by visual experience. *Nature* **462**, 218-221 (2009).
- 612 41. N. Ognjanovski, D. Maruyama, N. Lashner, M. Zochowski, S. J. Aton, CA1 hippocampal network  
613 activity changes during sleep-dependent memory consolidation. *Front Syst Neurosci* **8**, 61  
614 (2014).
- 615 42. B. M. Hooks, C. Chen, Circuitry Underlying Experience-Dependent Plasticity in the Mouse Visual  
616 System. *Neuron* **106**, 21-36 (2020).
- 617 43. K. Nakadate, K. Imamura, Y. Watanabe, Effects of monocular deprivation on the spatial pattern  
618 of visually induced expression of c-Fos protein *Neuroscience* **202**, 17-28 (2012).
- 619 44. M. Mainardi, S. Landi, N. Berardi, L. Maffei, T. Pizzorusso, Reduced Responsiveness to Long-Term  
620 Monocular Deprivation of Parvalbumin Neurons Assessed by c-Fos Staining in Rat Visual Cortex.  
621 *PLoS One* **4** (2009).

- 622 45. Y. Zhou *et al.*, REM sleep promotes experience-dependent dendritic spine elimination in the  
623 mouse cortex *Nat Communications* **11** (2020).
- 624 46. S. F. Cooke, M. F. Bear, How the mechanisms of long-term synaptic potentiation and depression  
625 serve experience-dependent plasticity in primary visual cortex. *Philos Trans R Soc London B Biol*  
626 *Sci* **369** (2014).
- 627 47. A. Maffei, K. Nataraj, S. B. Nelson, G. G. Turrigiano, Potentiation of cortical inhibition by visual  
628 deprivation. *Nature* **443**, 81-84 (2006).
- 629 48. Y. Guo *et al.*, Timing-dependent LTP and LTD in mouse primary visual cortex following different  
630 visual deprivation models. *PLoS One* **12** (2017).
- 631 49. M. Kaneko, M. P. Stryker, Homeostatic plasticity mechanisms in mouse V1. *Philos Trans R Soc*  
632 *London B Biol Sci* **372** (2017).
- 633 50. T. D. Mrsic-Flogel *et al.*, Homeostatic regulation of eye-specific responses in visual cortex during  
634 ocular dominance plasticity. *Neuron* **54**, 961-972 (2007).
- 635 51. A. Ranson, C. E. J. Cheetham, K. Fox, F. Sengpiel, Homeostatic plasticity mechanisms are  
636 required for juvenile, but not adult, ocular dominance plasticity. *Proc Natl Acad Sci USA* **109**,  
637 1311-1316 (2012).
- 638 52. M. E. Lambo, G. G. Turrigiano, Synaptic and Intrinsic Homeostatic Mechanisms Cooperate to  
639 Increase L2/3 Pyramidal Neuron Excitability during a Late Phase of Critical Period Plasticity. *J*  
640 *Neurosci* **33**, 8810-8819 (2013).
- 641 53. A. T. Pacheco, J. Bottorff, Y. Z. Gao, G. G. Turrigiano, Sleep Promotes Downward Firing Rate  
642 Homeostasis *Neuron* **109**, 530-544 (2021).
- 643 54. J. Seibt *et al.*, The non-benzodiazepine hypnotic Zolpidem impairs sleep-dependent cortical  
644 plasticity. *SLEEP In Press* (2008).
- 645 55. S. J. Aton *et al.*, The sedating antidepressant trazodone impairs sleep-dependent cortical  
646 plasticity. *PLoS ONE* **4**, e6078 (2009).
- 647 56. M. C. Dumoulin *et al.*, Extracellular Signal-Regulated Kinase (ERK) Activity During Sleep  
648 Consolidates Cortical Plasticity In Vivo. *Cereb. Cortex* **25**, 507-515 (2015).
- 649 57. J. Durkin *et al.*, Cortically coordinated NREM thalamocortical oscillations play an essential,  
650 instructive role in visual system plasticity. *Proceedings National Academy of Sciences* **114**,  
651 10485-10490 (2017).
- 652 58. B. C. Clawson, J. Durkin, S. J. Aton, Form and function of sleep spindles across the lifespan.  
653 *Neural Plast.* **2016**, 6936381 (2016).
- 654 59. J. M. Durkin, S. J. Aton, How Sleep Shapes Thalamocortical Circuit Function in the Visual System.  
655 *Annu Rev Vis Sci* **5**, 295-315 (2019).
- 656 60. B. C. Clawson *et al.*, Causal role for sleep-dependent reactivation of learning-activated sensory  
657 ensembles for fear memory consolidation. *Nat Communications* **12** (2021).
- 658 61. S. J. Aton, J. Seibt, M. G. Frank (2009) Sleep and memory. in *Encyclopedia of Life Science* (John  
659 Wiley and Sons, Ltd., Chichester).
- 660 62. J. Seibt, M. G. Frank, Primed to Sleep: The Dynamics of Synaptic Plasticity Across Brain States.  
661 *Front Systems Neurosci* /10.3389/fnsys.2019.00002 (2019).
- 662 63. J. Delorme *et al.*, Hippocampal neurons' cytosolic and membrane-bound ribosomal transcript  
663 profiles are differentially regulated by learning and subsequent sleep. *Proc Natl Acad Sci USA*  
664 **118** (2021).
- 665 64. M. C. D. Bridi *et al.*, Daily Oscillation of the Excitation-Inhibition Balance in Visual Cortical  
666 Circuits. *Neuron* **105**, 621-629 (2020).
- 667 65. B. C. Clawson *et al.*, Sleep Promotes, and Sleep Loss Inhibits, Selective Changes in Firing Rate,  
668 Response Properties and Functional Connectivity of Primary Visual Cortex Neurons. *Frontiers in*  
669 *Systems Neuroscience* **12**, 40 (2018).

- 670 66. A. Steinzeig, C. Cannarozzo, E. Castren, Fluoxetine-induced plasticity in the visual cortex outlasts  
671 the duration of the naturally occurring critical period. *Eur J Neurosci* **50**, 3663-3673 (2019).
- 672 67. J. F. M. Vetencourt *et al.*, The Antidepressant Fluoxetine Restores Plasticity in the Adult Visual  
673 Cortex  
10.1126/science.1150516. *Science* **320**, 385-388 (2008).
- 674 68. J. A. Heimel, D. van Versendaal, C. N. Levelt, The Role of GABAergic Inhibition in Ocular  
675 Dominance Plasticity. *Neural Plast* **2011** (2011).
- 676 69. G. Sansevero *et al.*, Running towards amblyopia recovery. *Sci Rep* **10** (2020).
- 677 70. L. Baroncelli *et al.*, Enriched experience and recovery from amblyopia in adult rats: impact of  
678 motor, social and sensory components *Neuropharmacology* **62**, 2388-2397 (2012).
- 679 71. S. D. Faulkner, V. Vorobyov, F. Sengpiel, Visual cortical recovery from reverse occlusion depends  
680 on concordant binocular experience. *J Neurophysiol* **95**, 1718-1726 (2006).
- 681 72. C. Lunghi *et al.*, A new counterintuitive training for adult amblyopia. *Annals of Clinical and  
682 Translational Neurology* **6**, 274-284 (2018).
- 683 73. R. Havekes, S. J. Aton, Impacts of sleep loss versus waking experience on brain plasticity: Parallel  
684 or orthogonal? *Trends in Neuroscience* **43**, 385-393 (2020).
- 685 74. F. Raven, P. R. A. Heckman, R. Havekes, P. Meerlo, Sleep deprivation-induced impairment of  
686 memory consolidation is not mediated by glucocorticoid stress hormones *J Sleep Res* **29** (2020).
- 687 75. N. W. Daw, H. Sato, K. Fox, T. Carmichael, R. Gingerich, Cortisol reduces plasticity in the kitten  
688 visual cortex. *J Neurobiol* **22**, 158-168 (1991).
- 689 76. J. M. Durkin, S. J. Aton, Sleep-dependent potentiation in the visual system is at odds with the  
690 Synaptic Homeostasis Hypothesis. *Sleep* (2016).
- 691 77. N. Ognjanovski *et al.*, Parvalbumin-expressing interneurons coordinate hippocampal network  
692 dynamics required for memory consolidation. *Nature Communications* **8**, 15039 (2017).
- 693 78. S. Bolte, F. P. Cordelieres, A guided tour into subcellular colocalization analysis in light  
694 microscopy. *J Microsc* **224**, 213-232 (2006).
- 695  
696
